# Supplementary material for: Observation of magnetic anomalies in one-step solvothermally synthesized nickel–cobalt ferrite nanoparticles
Source: Royal Society of Chemistry journal article supplement (doi:10.1039/c5nr06791j), 2016-01-01
Supplement: c5nr06791j1.pdf [file c5nr06791j1.pdf]

## Observation of Magnetic Anomalies in One-Step Solvothermally Synthesized Nickel-Cobalt Ferrite Nanoparticles

Gopal Datt<sup>a</sup>, Mousami Sen<sup>b</sup>, M. Manivel Raja<sup>c</sup> and A. C. Abhyankar<sup>a\*</sup>

<sup>a</sup>Department of Materials Engineering, Defence Institute of Advanced Technology, Girinagar, Pune 411025, India.

<sup>b</sup>Physical and Materials Chemistry Division and <sup>s</sup>Centre of Excellence on Surface Science, CSIR—National Chemical Laboratory, Dr. Homi Bhabha Road, Pune 411 008, India.

<sup>c</sup>Advanced Magnetics Group, Defence Metallurgical Research Laboratory, Hyderabad, 500 058, India.

\*Corresponding Author Address:

Tel. No.: +91-20-24304311,

Email: [ashutoshabhyankar@gmail.com](mailto:ashutoshabhyankar@gmail.com), [ashutosh@diat.ac.in](mailto:ashutosh@diat.ac.in)

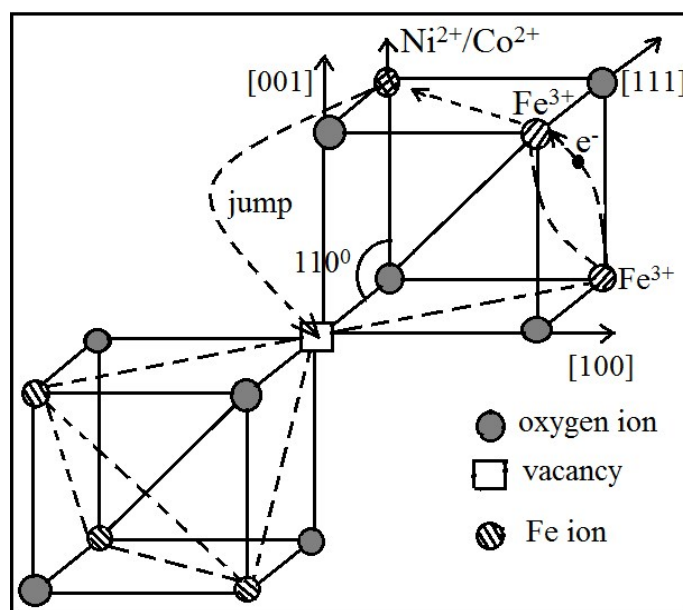

Figure S1: Adapted from <sup>19</sup>Kronmüller, H., R. Schützenauer, and F. W. *phys stat sol* **1995**, 151, 435–
